# Supplementary material
Source: MDPI journal article supplement (https://www.mdpi.com/1999-4907/9/9/506)
Supplement: s1 [file s1]

---

## A report for data analysis by different methods

To ensure the correct results, we analyze the data by different methods:

(1) For Fig.1 and table 1, we analysis and redrawn the figure, and got the same result as the submitted paper.

(2) For the table 2, We checked the data in four methods in SAM, including ① all data were transformed by log and community-weighted means were based on abundance of species in each plot (Table 2-A), ② all data not transformed and community-weighted means based on abundance of species in each plot (Table 2-B), ③ only environment factors were transformed by log and community-weighted means were based on abundance of species in each plot (Table 2-C), ④ all data were transformed by log and community-weighted means were based on basal area of species in each plot . We got the similar the study results. Restored time, followed by soil nutrients, were the most important limits to functional traits, species and functional diversity.

(3) For Fig.2 and Fig.3, we used three different methods to ensure the results: ① based on abundance, and all the functional traits were log-transformed to computer functional traits and functional diversity (Fig.3-A, Fig.4-A ), ② based on abundance, and functional traits were not log-transformed to computer functional traits and functional diversity (Fig.3-B, Fig.4-B), ③base on species basal area, and all the functional traits were log-transformed to computer functional traits (Fig.3-C, Fig.4-C). We all also got the following similar results in three different methods.

(4) For Fig.5, We reanalysis the environment data, and supplied information in detail.

**Table 1** Number of stems, species, species showing a significant preference for different tree sizes

| Tree sizes  | Number of stems |      |     |       | Number of species |      |     |       | No. species showing preference |          |           |           |
|-------------|-----------------|------|-----|-------|-------------------|------|-----|-------|--------------------------------|----------|-----------|-----------|
|             | 40_y            | 60_y | Old | Total | 40_y              | 60_y | Old | Total | 40_y                           | 60_y     | Old       | Total     |
| Saplings    | 235             | 482  | 308 | 1025  | 29                | 47   | 61  | 97    | 4                              | 11       | 9         | 24        |
| Treelets    | 312             | 427  | 251 | 990   | 34                | 48   | 61  | 101   | 6                              | 9        | 8         | 23        |
| Adult trees | 275             | 296  | 270 | 841   | 23                | 34   | 68  | 94    | <b>3</b>                       | <b>2</b> | <b>12</b> | <b>17</b> |
| Total       | 822             | 1205 | 829 | 2856  | 44                | 65   | 102 | 135   | 8                              | 15       | 24        | 47        |

Notes: Preference for forest recovery stage is analyzed using an indicator species value (Dufrene and Legendre 1997). Significant associations with each of the restored forest are tested using the probabilities of obtaining as great an indicator value as great an indicator value as observed over 1000 iterations.

**Table 2-A** The selected models with delta AIC, the importance of each environment parameters, the correlation direction and residual spatial autocorrelation(RSA )(Moran's values, p<0.05 was in bold). All the data (including environmental factors, functional traits, species and functional diversity) were transformed by log in this table. Eight functional traits using community-weighted means based on abundance of species in each plot.

|           | Log_Decid     | Log_SLA       | Log_LDMC      | Log_LNC       | Log_LPC       | Log_LKC       | Log_LCC       | Log_WD        | Log_Smass     | Log_S         | Log_H         | Log_J         | Log_FRic      | Log_FEve     | Log_FDiv      |
|-----------|---------------|---------------|---------------|---------------|---------------|---------------|---------------|---------------|---------------|---------------|---------------|---------------|---------------|--------------|---------------|
| Model     | #195          | #129          | #187          | #457          | #107          | #129          | #389          | #191          | #66           | #131          | #1            | #384          | #226          | #481         | #290          |
| R_adj     | 0.463         | 0.196         | 0.601         | 0.61          | 0.651         | 0.754         | 0.48          | 0.389         | 0.184         | 0.59          | 0.274         | -0.227        | 0.453         | 0.511        | -0.257        |
| F_radio   | 10.884        | -3.277        | -10.681       | -4.216        | 32.327        | -15.432       | -2.751        | 2.264         | 17.413        | -18.964       | 12.114        | 1.53          | 2.493         | 3.346        | 1.802         |
| log_Rtime | <b>-0.984</b> | <b>+0.746</b> | <b>-0.836</b> | <b>+0.666</b> | <b>+0.933</b> | <b>+0.985</b> | -0.369        | <b>+0.906</b> | <b>-0.996</b> | <b>+0.993</b> | <b>+0.93</b>  | +0.22         | <b>+0.992</b> | +0.213       | -0.213        |
| log_pH    | +0.244        | <b>-0.64</b>  | +0.214        | <b>-0.691</b> | <b>-0.844</b> | -0.464        | +0.35         | +0.231        | <b>-0.978</b> | +0.213        | -0.219        | -0.421        | +0.205        | -0.241       | <b>-0.534</b> |
| log_SOM   | <b>-0.466</b> | -0.283        | <b>+0.814</b> | +0.323        | <b>+0.502</b> | -0.318        | <b>-0.517</b> | <b>+0.581</b> | +0.351        | <b>+0.634</b> | +0.245        | -0.253        | +0.227        | -0.202       | <b>+0.695</b> |
| log_TN    | <b>-0.517</b> | +0.254        | +0.292        | <b>+0.536</b> | -0.448        | -0.257        | <b>+0.855</b> | +0.365        | +0.267        | <b>-0.566</b> | +0.208        | +0.232        | -0.199        | -0.201       | -0.861        |
| log_TP    | <b>+0.863</b> | +0.291        | -0.355        | <b>+0.66</b>  | <b>+0.698</b> | +0.289        | <b>-0.667</b> | +0.348        | -0.331        | -0.342        | +0.243        | +0.265        | <b>-0.529</b> | <b>+0.97</b> | +0.363        |
| log_TK    | +0.268        | +0.275        | +0.254        | <b>-0.587</b> | <b>-0.756</b> | -0.3          | <b>+0.593</b> | -0.228        | +0.2          | -0.235        | +0.331        | <b>+0.616</b> | -0.212        | -0.221       | +0.462        |
| log_AN    | -0.198        | +0.371        | <b>-0.873</b> | <b>-0.533</b> | +0.335        | +0.198        | <b>-0.965</b> | +0.208        | +0.176        | +0.258        | +0.21         | +0.209        | +0.197        | -0.221       | -0.293        |
| log_AP    | -0.292        | +0.285        | -0.277        | <b>+0.809</b> | <b>+0.592</b> | +0.386        | <b>+0.541</b> | <b>-0.642</b> | +0.314        | +0.271        | +0.29         | +0.238        | +0.463        | +0.248       | +0.396        |
| log_AK    | +0.252        | <b>+0.617</b> | -0.239        | <b>+0.903</b> | <b>+0.973</b> | <b>+0.637</b> | -0.351        | -0.255        | <b>+0.973</b> | -0.224        | +0.245        | <b>+0.496</b> | +0.217        | +0.221       | <b>+0.519</b> |
| Distance  | Moran's I     | Moran's I    | Moran's I     |
| 0.199     | 0.162         | -0.1          | -0.161        | -0.177        | -0.188        | -0.151        | -0.106        | -0.143        | -0.068        | -0.047        | -0.082        | -0.063        | -0.096        | -0.185       | <b>0.28</b>   |
| 0.601     | <b>-0.458</b> | <b>-0.225</b> | -0.042        | -0.093        | -0.04         | -0.117        | 0.054         | -0.138        | 0.012         | -0.167        | <b>-0.207</b> | <b>-0.248</b> | -0.146        | -0.005       | <b>0.277</b>  |
| 1.132     | 0.121         | 0.041         | -0.005        | 0.09          | 0.097         | 0.102         | -0.001        | 0.068         | 0.04          | 0.13          | 0.134         | 0.086         | 0.117         | -0.046       | 0.058         |
| 1.6       | <.001         | 0.128         | 0.042         | 0.168         | 0.075         | 0.072         | -0.013        | 0.021         | -0.109        | -0.023        | -0.008        | 0.031         | -0.026        | 0.036        | -0.076        |
| 1.873     | -0.15         | -0.042        | <.001         | -0.062        | 0.033         | 0.052         | -0.117        | -0.018        | -0.061        | -0.168        | -0.139        | -0.096        | -0.126        | -0.094       | -0.024        |
| 2.106     | 0.045         | -0.026        | -0.092        | -0.138        | -0.183        | -0.135        | -0.088        | -0.018        | -0.068        | 0.054         | 0.152         | 0.064         | 0.109         | -0.013       | <b>-0.234</b> |
| 2.396     | -0.188        | 0.003         | 0.013         | 0.087         | 0.007         | -0.06         | 0.002         | -0.02         | 0.048         | -0.204        | -0.181        | 0.013         | <b>-0.22</b>  | 0.107        | <b>-0.344</b> |
| 2.793     | 0.141         | -0.063        | -0.027        | -0.129        | -0.076        | -0.031        | 0.037         | -0.067        | -0.091        | 0.135         | 0.056         | -0.047        | 0.101         | -0.031       | <b>-0.216</b> |

**Table 2-B** The selected models with delta AIC, the importance of each environment parameters, the correlation direction and residual spatial autocorrelation(RSA )(Moran's values, p<0.05 was in bold). All the data were not transformed, and eight functional traits and functional diversity using community-weighted means based on abundance of species in each plot.

|          | Deciduous     | SLA           | LDMC          | LNC           | LPC           | LKC           | LCC           | WD        | Smass         | S             | H             | J             | FRic          | FEve          | FDiv          |
|----------|---------------|---------------|---------------|---------------|---------------|---------------|---------------|-----------|---------------|---------------|---------------|---------------|---------------|---------------|---------------|
| Model    | #163          | #250          | #187          | #128          | #82           | #256          | #389          | #191      | #126          | #131          | #130          | #497          | #1            | #481          | #290          |
| R_adj    | 0.603         | 0.097         | 0.357         | 0.814         | 0.267         | 0.78          | 0.45          | 0.384     | 0.377         | 0.554         | 0.374         | -0.284        | 0.429         | 0.503         | 0.099         |
| F_radio  | -8.543        | -2.606        | -2.613        | -2.609        | -2.771        | -2.865        | -2.56         | -2.563    | -3.648        | -2.978        | -2.697        | -2.597        | -6.431        | -2.626        | -2.618        |
| Rtime    | <b>-0.981</b> | <b>+0.73</b>  | <b>+0.639</b> | <b>+0.718</b> | <b>+0.987</b> | <b>+0.994</b> | -0.352        | +0.841    | <b>-0.989</b> | <b>+0.996</b> | <b>+0.951</b> | +0.223        | <b>+0.988</b> | +0.216        | +0.223        |
| pH       | -0.275        | -0.417        | -0.283        | <b>-0.823</b> | <b>-0.979</b> | <b>-0.482</b> | +0.257        | +0.263    | <b>-0.994</b> | +0.214        | +0.251        | -0.408        | +0.232        | -0.261        | <b>-0.669</b> |
| SOM      | <b>-0.52</b>  | -0.257        | <b>+0.546</b> | +0.344        | +0.298        | -0.23         | -0.46         | +0.534    | 0.223         | <b>+0.803</b> | +0.348        | +0.241        | +0.226        | +0.201        | <b>+0.699</b> |
| TN       | -0.381        | +0.264        | +0.414        | +0.343        | -0.465        | -0.209        | <b>+0.908</b> | +0.339    | 0.26          | <b>-0.735</b> | +0.229        | +0.244        | +0.217        | +0.201        | -0.861        |
| TP       | <b>+0.889</b> | +0.367        | -0.516        | <b>+0.623</b> | <b>-0.632</b> | -0.248        | +0.443        | +0.405    | -0.264        | -0.375        | -0.258        | +0.278        | +0.297        | <b>+0.936</b> | -0.301        |
| TK       | +0.329        | +0.287        | +0.269        | -0.392        | <b>-0.681</b> | -0.301        | +0.399        | +0.263    | -0.196        | -0.397        | +0.293        | <b>+0.597</b> | +0.392        | -0.212        | +0.449        |
| AN       | +0.203        | <b>+0.587</b> | <b>+0.942</b> | -0.366        | -0.171        | +0.198        | <b>-0.971</b> | +0.22     | 0.371         | +0.258        | +0.212        | +0.22         | +0.295        | +0.215        | +0.258        |
| AP       | -0.316        | +0.355        | +0.283        | <b>-0.668</b> | <b>-0.793</b> | +0.245        | <b>+0.776</b> | -0.455    | -0.222        | -0.274        | +0.267        | +0.237        | +0.254        | -0.246        | +0.263        |
| AK       | +0.248        | +0.43         | +0.35         | <b>+0.912</b> | <b>+0.994</b> | <b>+0.892</b> | +0.249        | +0.284    | <b>0.992</b>  | -0.226        | +0.295        | <b>+0.516</b> | +0.279        | +0.237        | <b>+0.625</b> |
| Distance | Moran's I     | Moran's I | Moran's I     | Moran's I     | Moran's I     | Moran's I     | Moran's I     | Moran's I     | Moran's I     |
| 0.199    | 0.17          | -0.092        | -0.169        | -0.179        | -0.179        | -0.167        | -0.108        | -0.145    | -0.105        | -0.057        | -0.072        | -0.057        |               | -0.173        | <b>0.277</b>  |
| 0.601    | <b>-0.451</b> | <b>-0.234</b> | -0.051        | -0.091        | -0.033        | -0.101        | 0.053         | -0.136    | 0.015         | <b>-0.179</b> | <b>-0.22</b>  | <b>-0.255</b> |               | -0.013        | <b>0.293</b>  |
| 1.132    | 0.149         | 0.044         | -0.001        | 0.09          | 0.092         | 0.108         | -0.002        | 0.068     | 0.007         | 0.111         | <b>0.154</b>  | 0.091         |               | -0.042        | 0.058         |
| 1.6      | 0.019         | 0.133         | 0.05          | <b>0.163</b>  | 0.064         | 0.076         | -0.01         | 0.018     | -0.071        | 0.019         | 0.036         |               |               | 0.044         | -0.066        |
| 1.873    | -0.174        | -0.052        | -0.009        | -0.058        | 0.048         | 0.076         | -0.12         | -0.02     | -0.07         | -0.169        | -0.164        | -0.114        |               | -0.108        | -0.026        |
| 2.106    | 0.033         | -0.029        | -0.081        | -0.141        | -0.196        | -0.165        | -0.084        | -0.013    | -0.067        | 0.005         | 0.132         | 0.072         |               | -0.023        | <b>-0.237</b> |
| 2.396    | -0.188        | 0.008         | 0.013         | 0.084         | 0.005         | -0.027        | 0.001         | -0.016    | 0.068         | -0.156        | -0.173        | 0.014         |               | 0.115         | <b>-0.354</b> |
| 2.793    | 0.121         | -0.064        | -0.026        | -0.124        | -0.071        | -0.074        | 0.038         | -0.071    | -0.062        | <b>0.142</b>  | 0.062         | -0.048        |               | -0.034        | <b>-0.226</b> |

**Table 2-C** The selected models with delta AIC, the importance of each environment parameters, the correlation direction and residual spatial autocorrelation(RSA )(Moran's values, p<0.05 was in bold). Environmental factors were transformed by log in this table. Eight functional traits and functional diversity using community-weighted means based on abundance of species in each plot.

|           | Deciduous     | SLA           | LDMC          | LNC           | LPC           | LKC           | LCC           | WD            | Smass         | S             | H             | J             | FRic          | FEve          | FDiv          |
|-----------|---------------|---------------|---------------|---------------|---------------|---------------|---------------|---------------|---------------|---------------|---------------|---------------|---------------|---------------|---------------|
| Model     | #163          | #129          | #187          | #125          | #107          | #122          | #389          | #191          | #114          | #131          | #1            | #384          | #256          | #481          | #290          |
| R_adj     | 0.71          | 0.266         | 0.58          | 0.583         | 0.588         | 0.809         | 0.477         | 0.392         | 0.315         | 0.644         | 0.415         | -0.197        | 0.499         | 0.542         | -0.179        |
| F_radio   | 9.934         | -12.798       | 2.24          | -9.675        | -22.561       | -63.008       | -15.211       | -6.084        | 4.568         | 30.04         | 18.822        | 12.693        | 5.754         | 69.694        | 5.388         |
| log_Rtime | <b>-0.998</b> | <b>+0.807</b> | <b>-0.796</b> | <b>+0.676</b> | <b>+0.927</b> | <b>+0.987</b> | -0.363        | <b>+0.906</b> | <b>-0.997</b> | <b>+0.991</b> | <b>+0.971</b> | +0.219        | <b>+0.991</b> | +0.226        | -0.218        |
| log_pH    | -0.218        | <b>-0.631</b> | +0.223        | <b>-0.682</b> | -0.873        | <b>-0.623</b> | +0.351        | +0.23         | <b>-0.991</b> | +0.275        | +0.216        | -0.458        | +0.303        | -0.243        | -0.481        |
| log_SOM   | <b>-0.551</b> | -0.296        | <b>+0.793</b> | +0.358        | +0.454        | -0.35         | <b>-0.522</b> | <b>+0.593</b> | +0.308        | <b>+0.609</b> | +0.237        | -0.259        | +0.206        | -0.202        | <b>+0.657</b> |
| log_TN    | -0.397        | +0.263        | +0.299        | <b>+0.581</b> | -0.453        | -0.272        | <b>+0.849</b> | +0.358        | +0.294        | <b>-0.525</b> | +0.205        | +0.236        | +0.203        | +0.203        | <b>-0.815</b> |
| log_TP    | <b>+0.941</b> | +0.283        | -0.388        | <b>+0.653</b> | <b>+0.772</b> | +0.226        | <b>-0.672</b> | +0.35         | -0.366        | +0.265        | +0.218        | +0.274        | +0.213        | <b>+0.967</b> | +0.375        |
| log_TK    | +0.239        | -0.278        | +0.269        | <b>-0.613</b> | <b>-0.809</b> | -0.375        | <b>+0.595</b> | -0.227        | -0.199        | -0.297        | +0.289        | <b>+0.581</b> | +0.353        | -0.222        | +0.473        |
| log_AN    | +0.193        | +0.335        | <b>-0.878</b> | <b>-0.606</b> | +0.338        | -0.208        | <b>-0.964</b> | +0.207        | +0.188        | +0.254        | +0.197        | +0.204        | +0.26         | -0.233        | -0.345        |
| log_AP    | +0.257        | +0.275        | -0.277        | <b>+0.829</b> | <b>+0.609</b> | +0.23         | <b>+0.537</b> | <b>-0.643</b> | +0.266        | +0.251        | +0.245        | -0.243        | +0.216        | +0.264        | +0.414        |
| log_AK    | +0.232        | <b>+0.606</b> | -0.254        | <b>+0.898</b> | <b>+0.984</b> | <b>+0.82</b>  | -0.351        | -0.257        | <b>+0.991</b> | -0.335        | +0.24         | <b>+0.541</b> | +0.347        | +0.234        | +0.469        |
| Distance  | Moran's I     |
| 0.199     | 0.17          | -0.092        | -0.169        | -0.179        | -0.179        | -0.167        | -0.108        | -0.145        | -0.105        | -0.057        | -0.072        | -0.057        |               | -0.173        | <b>0.277</b>  |
| 0.601     | <b>-0.451</b> | <b>-0.234</b> | -0.051        | -0.091        | -0.033        | -0.101        | 0.053         | -0.136        | 0.015         | <b>-0.179</b> | <b>-0.22</b>  | <b>-0.255</b> |               | -0.013        | <b>0.293</b>  |
| 1.132     | 0.149         | 0.044         | -0.001        | 0.09          | 0.092         | 0.108         | -0.002        | 0.068         | 0.007         | 0.111         | <b>0.154</b>  | 0.091         |               | -0.042        | 0.058         |
| 1.6       | 0.019         | 0.133         | 0.05          | <b>0.163</b>  | 0.064         | 0.076         | -0.01         | 0.018         | -0.071        | 0.019         | 0.007         | 0.036         |               | 0.044         | -0.066        |
| 1.873     | -0.174        | -0.052        | -0.009        | -0.058        | 0.048         | 0.076         | -0.12         | -0.02         | -0.07         | -0.169        | -0.164        | -0.114        |               | -0.108        | -0.026        |
| 2.106     | 0.033         | -0.029        | -0.081        | -0.141        | -0.196        | -0.165        | -0.084        | -0.013        | -0.067        | 0.005         | 0.132         | 0.072         |               | -0.023        | <b>-0.237</b> |
| 2.396     | -0.188        | 0.008         | 0.013         | 0.084         | 0.005         | -0.027        | 0.001         | -0.016        | 0.068         | -0.156        | -0.173        | 0.014         |               | 0.115         | <b>-0.354</b> |
| 2.793     | 0.121         | -0.064        | -0.026        | -0.124        | -0.071        | -0.074        | 0.038         | -0.071        | -0.062        | <b>0.142</b>  | 0.062         | -0.048        |               | -0.034        | <b>-0.226</b> |

**Table 2-D** The selected models with delta AIC, the importance of each environment parameters, the correlation direction and residual spatial autocorrelation(RSA )(Moran's values, p<0.05 was in bold). The data, including environmental factors, functional richness, were transformed by log in this table. Eight functional traits and functional diversity using community-weighted means based on tree basal area of species in each plot.

|         | Deciduous     | SLA           | LDMC          | LNC           | LPC           | LKC           | LCC           | WD            | Smass         | S             | H             | J             | Log_FRic      | FEve      | FDiv          |
|---------|---------------|---------------|---------------|---------------|---------------|---------------|---------------|---------------|---------------|---------------|---------------|---------------|---------------|-----------|---------------|
| Model   | #219          | #484          | #493          | #457          | #107          | #363          | #484          | #255          | #194          | #131          | #1            | #384          | #226          | #481      | #380          |
| r_adj   | 0.799         | 0.777         | 0.611         | 0.806         | 0.824         | 0.317         | 0.672         | 0.105         | -0.292        | 0.644         | 0.415         | -0.197        | 0.384         | -0.324    | 0.429         |
| Rtime   | <b>-0.976</b> | <b>+0.664</b> | -0.442        | <b>+0.695</b> | <b>+0.863</b> | +0.293        | -0.314        | <b>+0.67</b>  | <b>-0.982</b> | <b>+0.991</b> | <b>+0.971</b> | +0.219        | <b>+0.987</b> | -0.38     | -0.217        |
| Log_pH  | +0.382        | <b>-0.577</b> | <b>+0.492</b> | <b>-0.544</b> | <b>-0.917</b> | <b>-0.6</b>   | +0.329        | +0.444        | -0.317        | +0.275        | +0.216        | -0.458        | -0.217        | -0.239    | <b>-0.531</b> |
| Log_SOM | +0.214        | -0.338        | +0.292        | -0.308        | -0.274        | -0.44         | +0.352        | -0.277        | +0.261        | <b>+0.609</b> | +0.237        | -0.259        | +0.229        | +0.344    | +0.39         |
| Log_TN  | <b>-0.959</b> | +0.267        | +0.289        | <b>+0.514</b> | +0.422        | -0.319        | +0.482        | +0.399        | +0.324        | <b>-0.525</b> | +0.205        | +0.236        | -0.283        | -0.26     | -0.377        |
| Log_TP  | -0.247        | <b>+0.94</b>  | <b>-0.887</b> | <b>+0.783</b> | <b>+0.706</b> | <b>+0.751</b> | <b>-0.924</b> | +0.425        | +0.238        | +0.265        | +0.218        | +0.274        | <b>-0.569</b> | -0.486    | +0.428        |
| Log_TK  | +0.224        | -0.415        | +0.296        | <b>-0.572</b> | <b>-0.659</b> | <b>+0.467</b> | <b>+0.519</b> | -0.262        | +0.433        | -0.297        | +0.289        | <b>+0.581</b> | -0.256        | -0.249    | <b>-0.469</b> |
| Log_AN  | <b>+0.966</b> | +0.434        | <b>-0.777</b> | -0.418        | -0.307        | <b>+0.522</b> | <b>-0.921</b> | -0.262        | +0.226        | +0.254        | +0.197        | +0.204        | +0.214        | -0.388    | <b>-0.797</b> |
| Log_AP  | -0.212        | <b>+0.51</b>  | -0.32         | <b>+0.667</b> | <b>-0.55</b>  | +0.388        | -0.393        | -0.396        | +0.261        | +0.251        | +0.245        | -0.243        | <b>+0.532</b> | +0.437    | <b>+0.802</b> |
| Log_AK  | +0.335        | +0.386        | <b>+0.565</b> | <b>+0.785</b> | <b>+0.978</b> | <b>-0.465</b> | +0.374        | <b>+0.492</b> | +0.27         | -0.335        | +0.24         | <b>+0.541</b> | +0.227        | -0.252    | <b>+0.68</b>  |
| DistCnt | Moran's I     | Moran's I | Moran's I     |
| 0.199   | 0.023         | -0.187        | -0.156        | -0.169        | -0.189        | -0.105        | -0.207        | 0.036         | -0.048        | -0.057        | -0.072        | -0.057        | -0.075        | -0.046    | 0.187         |
| 0.601   | -0.165        | -0.113        | -0.031        | -0.117        | -0.077        | -0.138        | 0.033         | -0.069        | -0.083        | -0.179        | -0.22         | -0.255        | -0.131        | -0.128    | 0.229         |
| 1.132   | <b>0.163</b>  | -0.043        | -0.089        | 0.025         | -0.012        | -0.022        | -0.074        | <b>0.238</b>  | -0.005        | 0.111         | 0.154         | 0.091         | 0.094         | 0.033     | 0.042         |
| 1.6     | 0.005         | <b>0.259</b>  | 0.112         | <b>0.235</b>  | <b>0.18</b>   | 0.148         | 0.069         | -0.046        | 0.058         | 0.019         | 0.007         | 0.036         | -0.074        | -0.154    | -0.115        |
| 1.873   | <b>-0.274</b> | -0.113        | -0.015        | -0.133        | -0.026        | -0.122        | 0.098         | <b>-0.28</b>  | 0.207         | -0.169        | -0.164        | -0.114        | -0.14         | 0.05      | -0.194        |
| 2.106   | -0.054        | -0.145        | -0.114        | -0.15         | -0.161        | -0.098        | -0.188        | -0.025        | -0.21         | 0.005         | 0.132         | 0.072         | 0.139         | 0.031     | -0.196        |
| 2.396   | -0.122        | <b>0.176</b>  | 0.064         | 0.121         | 0.099         | <b>0.146</b>  | 0.078         | -0.022        | -0.073        | -0.156        | -0.173        | 0.014         | -0.24         | -0.025    | -0.244        |
| 2.793   | 0.139         | -0.1          | 0.007         | -0.096        | -0.069        | -0.089        | -0.026        | -0.099        | -0.059        | 0.142         | 0.062         | -0.048        | 0.148         | 0.052     | 0.057         |

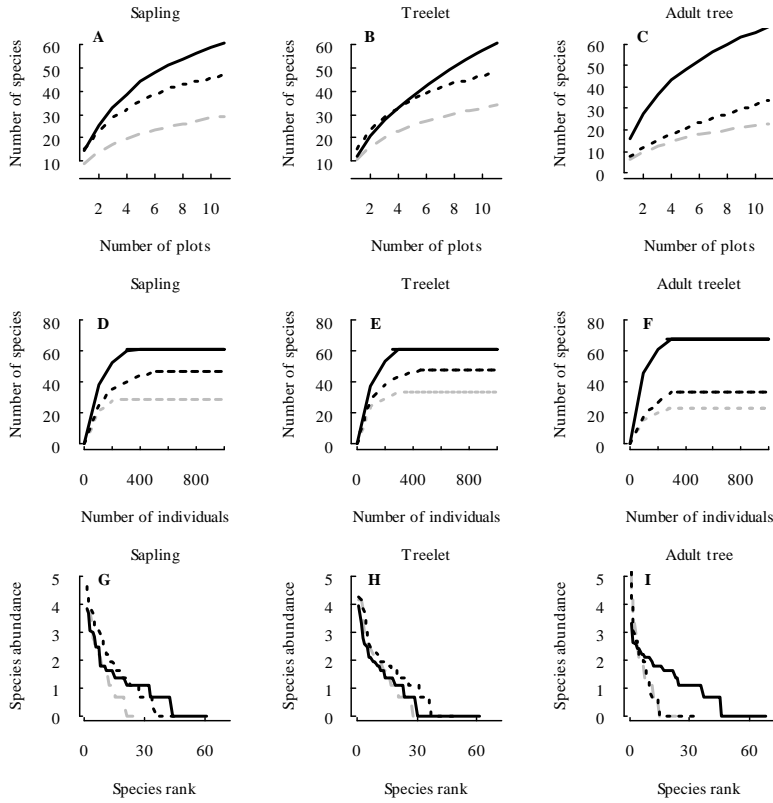

Fig.1 The species-area accumulation curves, species-individual accumulation curves, and species rank-abundance diagrams of tropical monsoon forest tree species with different recovery ages(gray dashed lines represent 40-year forests, black dotted lines represent 60-year forests, and black solid lines represent old-growth forests; tree size class: saplings( $1\text{ cm} \leq \text{dbh} < 5\text{ cm}$ ), treelets ( $5\text{ cm} \leq \text{dbh} < 10\text{ cm}$ ), and adult trees( $\text{dbh} \geq 10\text{ cm}$ ))

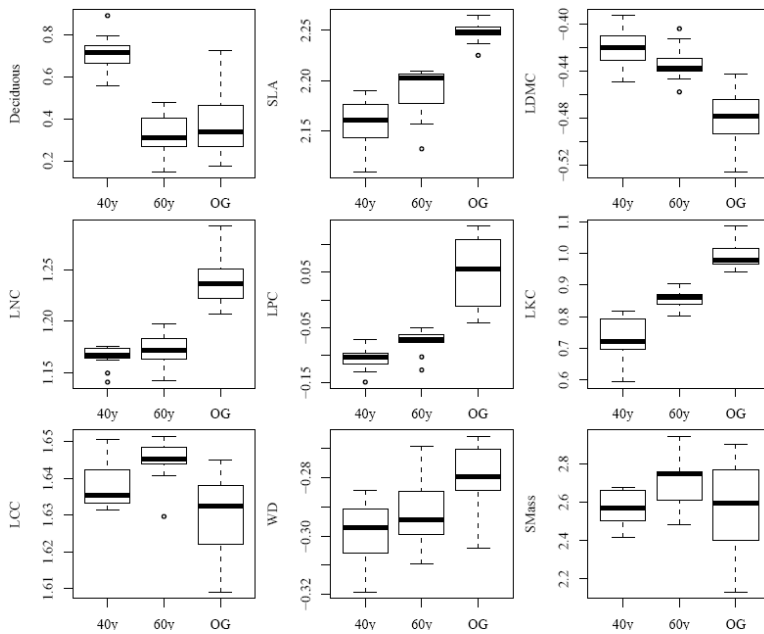

Fig.3-A The changes of functional traits with the secondary succession of monsoon forests (Eight

functional traits using community-weighted means based on log-transformed traits and tree abundance of species in each plot)

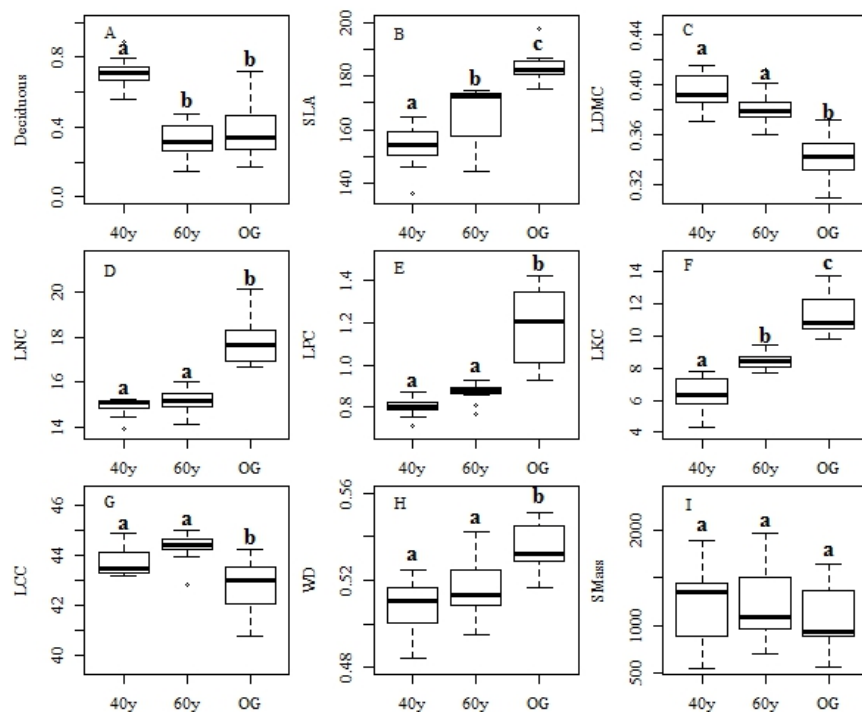

Fig.3-B The changes of functional traits with the secondary succession of monsoon forests (Eight functional traits using community-weighted means based on not log-transformed traits and tree abundance of species in each plot)

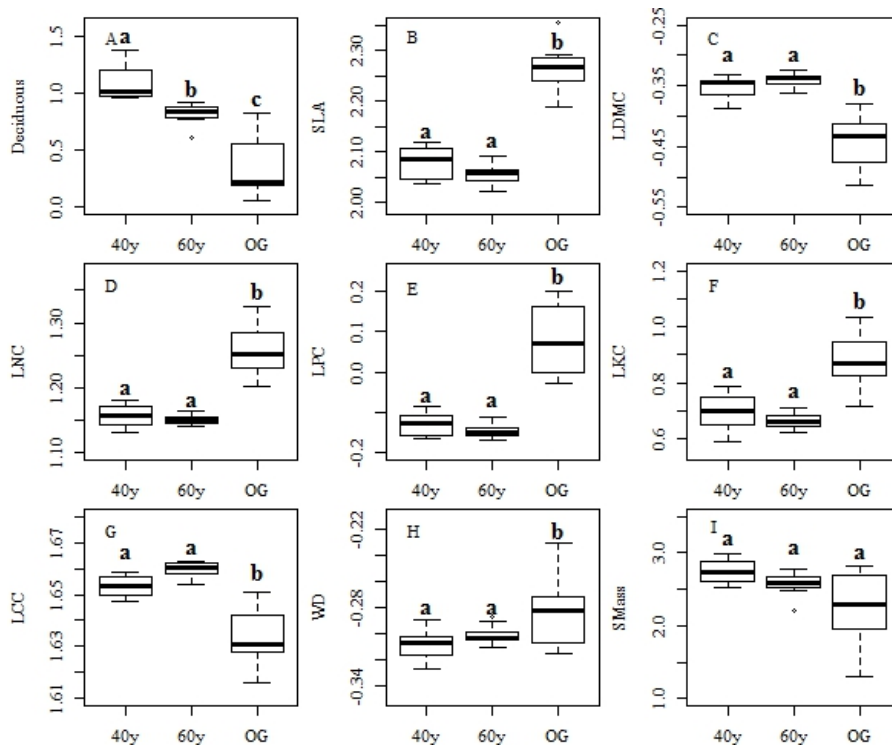

Fig.3-C The changes of functional traits with the secondary succession of monsoon forests (Eight functional traits using community-weighted means based on log-transformed traits and tree basal area of species in each plot)

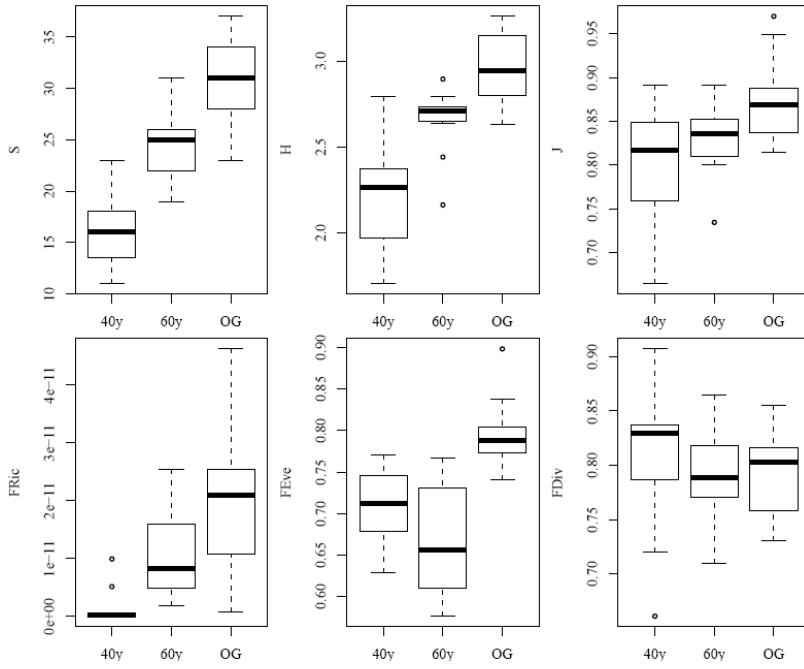

Fig.4-A The changes of species and functional diversity with secondary succession of monsoon forests ((Functional diversity based on tree abundance in every plot, and functional traits log-transformed)

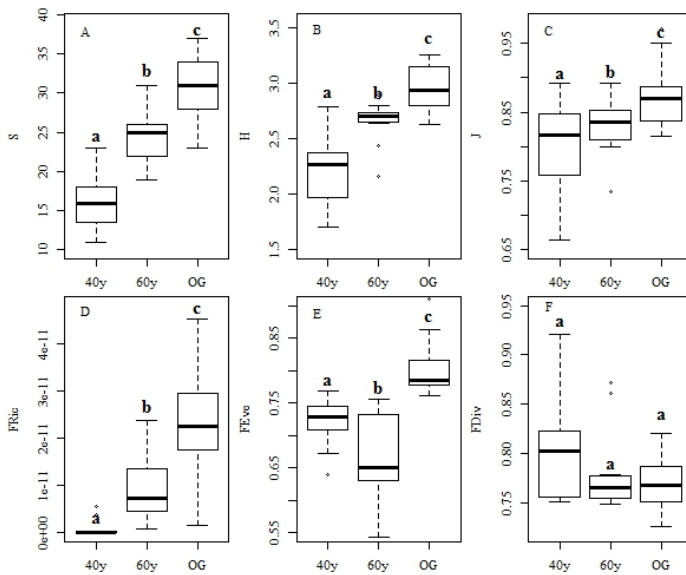

Fig.4-B The changes of species and functional diversity with secondary succession of monsoon forests (Functional diversity were defined basing on tree abundance in every plot, and functional traits not log-transformed)

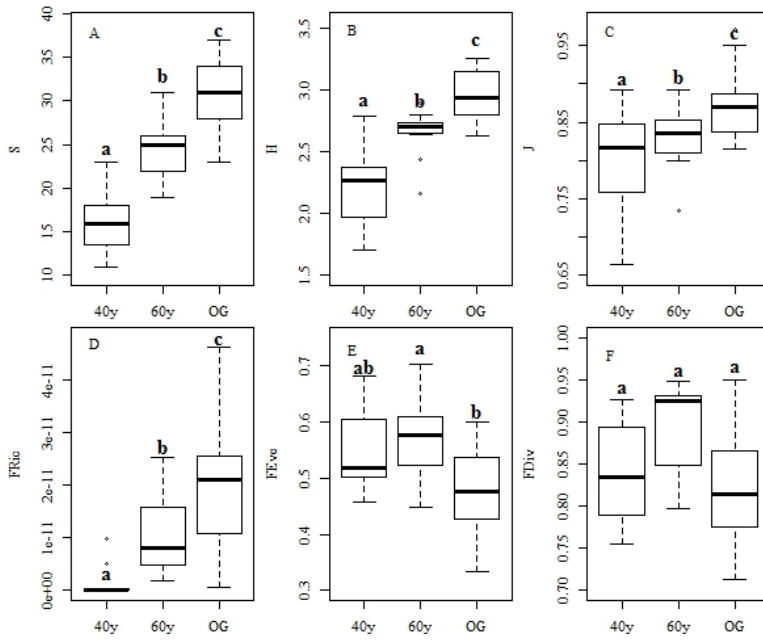

Fig.4-C The changes of species and functional diversity with secondary succession of monsoon forests (Functional diversity were defined basing on tree basal area in every plot, and functional traits log-transformed)

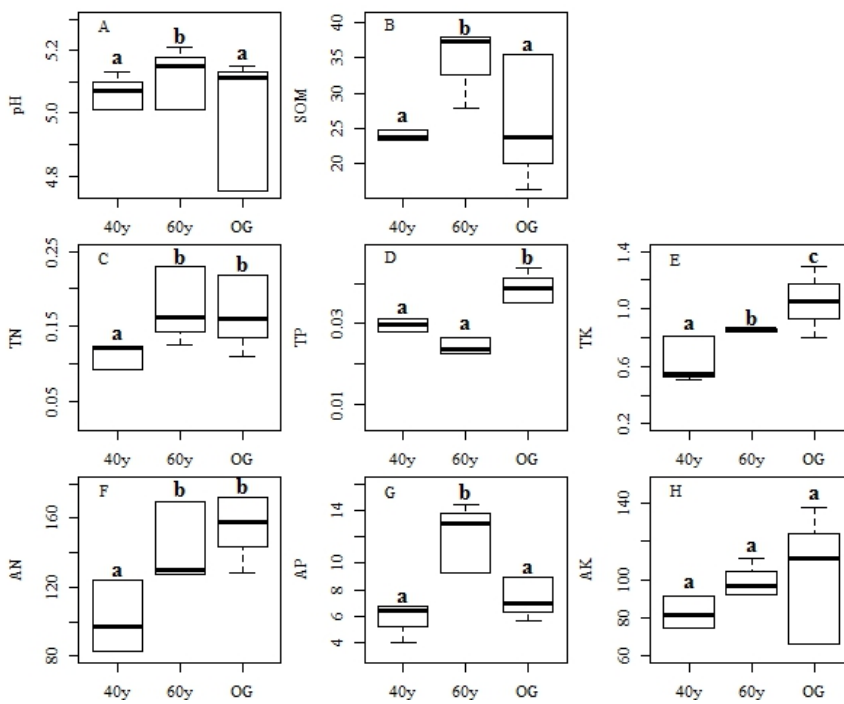

Fig.5 The changes of soil nutrient factors during succession in tropical monsoon forests



---

Information in detail for figures in paper
